P2829

### Arrhythmia burden during long-term follow-up in a large cohort of patients surviving out-of-hospital cardiac arrest

J. Caro Codon<sup>1</sup>, L. Rodriguez Sotelo<sup>1</sup>, J.R. Rey Blas<sup>1</sup>, O. Gonzalez Fernandez<sup>1</sup>, S.O. Rosillo Rodriguez<sup>1</sup>, E. Armada Romero<sup>1</sup>, A. Iniesta Manjavacas<sup>1</sup>, J. Ruiz Cantador<sup>1</sup>, B. Casas Sanchez<sup>2</sup>, J. Fernandez De Bobadilla<sup>1</sup>, I. Marco Clement<sup>1</sup>, L. Martin Polo<sup>1</sup>, C. Merino Argos<sup>1</sup>, J.L. Lopez-Sendon<sup>1</sup>, E. Lopez-De-Sa<sup>1</sup>

<sup>1</sup>University Hospital La Paz, Department of Cardiology, Madrid, Spain; <sup>2</sup>Autonomous University of Madrid, Madrid, Spain

**Background:** Data regarding incidence of ventricular (VA) and atrial arrhythmias (AA) in survivors after out-of-hospital cardiac arrest (OHCA) are scarce.

**Purpose:** To assess incidence of VA and AA in OHCA patients during long-term follow-up and to identify relevant predictive factors during the index hospital admission.

**Methods:** All consecutive patients admitted to the Acute Cardiac Care Unit after OHCA from August 2007 to January 2019 and surviving until hospital discharge were included. Cox proportional hazard models and logistic regression analysis were used to investigate clinical variables related to the incidence of VA and AA.

**Results:** The final analysis included 201 patients. Mean age was 57.6±14.2 years and 168 (83.6%) were male. The majority of patients experienced witnessed arrests related to shockable rhythms (176, 87.6%).

Thirty-six patients (17.9%) died after a median follow-up of 40.3 months (18.9–69.1), but only 4 presented another cardiac arrest. Eighteen patients (9.0%) suffered new VA and 37 (18.4%) developed atrial fibrillation/atrial flutter. History of coronary heart disease [HR 3.59 (1.37–9.42), p=0.010] and non-acute coronary syndrome-related arrhythmia [HR 5.17 (1.18–22.60), p=0.029] were independent predictors of VA during follow-up. The optimal predictive model for atrial arrhythmias included age at the time of OHCA, LVEF at hospital discharge and non-acute coronary syndrome-related arrhythmias (p<0.001).

**Conclusions:** Despite low incidence of recurrent cardiac arrest, OHCA survivors face a high incidence of VA and AA. Several clinical characteristics during index hospital admission may be useful to identify patients at high risk.

Table 1

| Variable                                   | Without VA | With VA   | p value |
|--------------------------------------------|------------|-----------|---------|
| Age, mean ± DS, years                      | 57.4±14.2  | 60.8±14.7 | 0.336   |
| Male sex, n (%)                            | 150 (83.3) | 15 (83.3) | 1.000   |
| Coronary heart disease, n (%)              | 36 (20.0)  | 11 (61.1) | <0.001  |
| Cardiomyopathy, n (%)                      | 27 (15.0)  | 8 (44.4)  | 0.006   |
| Shockable rhythm, n (%)                    | 157 (87.2) | 16 (88.9) | 1.000   |
| ACS-related arrhythmia (Primary VF), n (%) | 83 (46.1)  | 2 (11.1)  | 0.004   |
| LVEF at hospital discharge (%)             | 47.5±13.9  | 38.3±16.5 | 0.010   |
| Death during follow-up                     | 32 (17.8)  | 3 (16.7)  | 0.603   |
| Cardiac arrest during follow-up            | 2 (1.1)    | 2 (11.1)  | 0.042   |
| CV hospital admission during follow-up     | 39 (21.7)  | 14 (77.8) | <0.001  |
| Atrial arrhythmias during follow-up        | 28 (15.6)  | 9 (50.0)  | <0.001  |

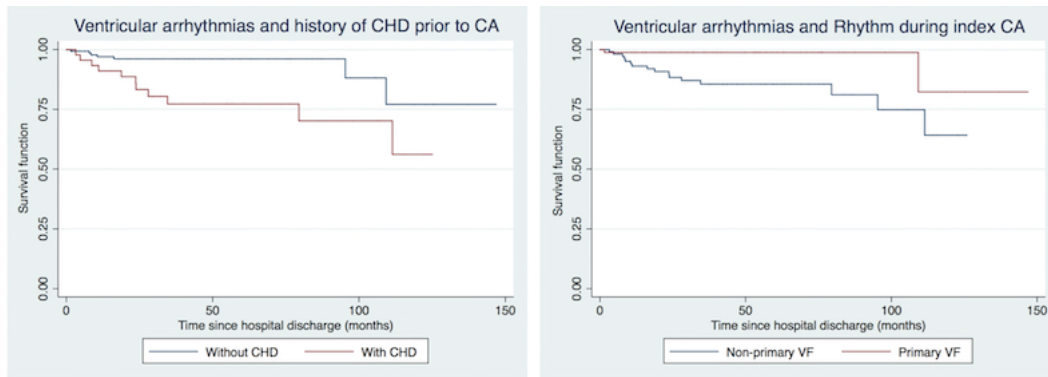

Figure 1
